# Supplementary material for: The role of glutamate in neuronal ion homeostasis: A case study of spreading depolarization
Source: PubMed Central journal article supplement (PMC5655358; doi:10.1371/journal.pcbi.1005804), 2017-10-12
Supplement: pcbi.1005804.s001.pdf [file pcbi.1005804.s001.pdf]

# S1 Text:

## The Role of Glutamate in Neuronal Ion Homeostasis: A Case Study of Spreading Depolarization

Niklas Hübel <sup>1</sup>, Mahshid S Hosseini-Zare<sup>2</sup>, Jokūbas Žiburkus <sup>2</sup>, Ghanim Ullah <sup>1,\*</sup>

<sup>1</sup>Department of Physics, University of South Florida,  
Tampa, FL 33620, USA,

<sup>2</sup>Department of Biology and Biochemistry, University of Houston,  
Houston, TX 77204, USA

### Standard Model for Neural Ion Dynamics

Rate equations for the membrane potential of the neuron, gating variables for  $K^+$  and  $Na^+$  channels, ion concentrations inside the neuron, glia, and ECS, and volumes of the neuron, glia cell, and ECS are based on our previous work [1, 2, 3, 4, 5, 6, 7, 8, 9, 10, 11, 12]. Here we describe these equations together with the modifications due to the inclusion of glutamate dynamics, and the morphology used in this model.

### Membrane Model

We refer to the rate equations for the membrane potential and the gating dynamics as the membrane model. It is a variant of the classical Hodgkin–Huxley (HH) description of the neural membrane [13, 14]. The membrane has a capacitance  $C_m$  and carries a potential  $V$ , which follows a Kirchhoff law and is governed by the  $K^+$ ,  $Na^+$ , and  $Cl^-$  ion currents  $I_K$ ,  $I_{Na}$ , and  $I_{Cl}$ , respectively. In the rate equations below a pump current  $I_p$  is also included. It has an important role in the ion dynamics (see below).

There are leak ion channels and voltage-gated channels that depend on the gating variables  $n$  ( $K^+$  activation),  $m$  ( $Na^+$  inactivation), and  $h$  ( $Na^+$  activation). The gating dynamics are given by the HH exponential functions  $\alpha_x$  and  $\beta_x$  (for  $x \in \{n, m, h\}$ ). The full membrane

model reads

$$\frac{dV}{dt} = -\frac{1}{C_m}(I_{Na} + I_K + I_{Cl} + I_p) , \quad (1S)$$

$$\frac{dn}{dt} = \phi \left( \alpha_n(1 - n) - \beta_n n \right) , \quad (2S)$$

$$\frac{dh}{dt} = \phi \left( \alpha_h(1 - h) - \beta_h h \right) , \quad (3S)$$

with the conventional timescale parameter  $\phi$ , and an adiabatic approximation for the extremely fast  $m$ -gate:

$$m = m_\infty = \frac{\alpha_m}{\alpha_m + \beta_m} \quad (4S)$$

The voltage-dependent exponential functions are

$$\alpha_n = \frac{0.01(V + 34)}{1 - \exp(-(V + 34)/10)} , \quad (5S)$$

$$\beta_n = 0.125 \exp(-(V + 44)/80) , \quad (6S)$$

$$\alpha_m = \frac{0.1(V + 30)}{1 - \exp(-(V + 30)/10)} , \quad (7S)$$

$$\beta_m = 4 \exp(-(V + 55)/18) , \quad (8S)$$

$$\alpha_h = 0.07 \exp(-(V + 44)/20) , \quad (9S)$$

$$\beta_h = \frac{1}{1 + \exp(-(V + 14)/10)} . \quad (10S)$$

These equations were originally adopted from [14] and have been used extensively by us and other groups. Nevertheless, we have tested in the past that states like seizure, SD, and anoxic depolarization are robust in the face of different types of formalisms for ion channels including the Goldman-Hodgkin-Katz formalism [9].

The currents  $I_{ion}$  (for  $ion \in \{K, Na, Cl\}$ ) are all of the form

$$I_{ion} = g_{ion}(V - E_{ion}) . \quad (11S)$$

with conductances  $g_{ion}$  that are a combination of leak and gated parts. Leak conductances and maximal conductances of gated channels are denoted by a superscript  $l$  and  $g$ , respec-

tively:

$$g_K = g_K^l + g_K^g n^4 , \quad (12S)$$

$$g_{Na} = g_{Na}^l + g_{Na}^g m^3 h , \quad (13S)$$

$$g_{Cl} = g_{Cl}^l . \quad (14S)$$

The Nernst potentials  $E_{ion}$  are given by the ion concentrations  $ion_{i/e}$  in the intra-/extracellular space (ICS and ECS), and the ion valence  $z_{ion}$ :

$$E_{ion} = \frac{26.64}{z_{ion}} \ln(ion_e/ion_i) \quad (15S)$$

The coefficient 26.64 mV can be derived from the ideal gas constant, the absolute temperature, and Faraday's constant. In addition to these currents we will also include  $Na^+$  and  $K^+$  currents through AMPA and NMDA receptor gates. Also glutamate uptake by the neuron comes with ion cotransport which will be included as well (see below). The conductances and other parameters defining the membrane model are given in Table A.

We would like to remark that the Hodgkin-Huxley formalism uses linear relationships for current and voltage (Ohm's law). Nevertheless, it is well known that the actual current flowing through ion-selective permeability channels in the neuronal membrane is nonlinear, rectifying [15], and can be more accurately accounted for using the Goldman-Hodgkin-Katz (GHK) equations [16]. However, we have previously shown that the two formalisms result in qualitatively same dynamics under extreme conditions such as seizures and SD [9].

### Ion Dynamics, Ion Regulation, and Osmosis

The above introduced currents induce ion fluxes. The changes in the intracellular ion amounts  $N_i^{ion}$  due to these currents follow from converting currents to fluxes by a factor

$$\gamma = \frac{A_m}{F} \quad (16S)$$

that depends on the membrane surface area  $A_m$  and Faraday's constant  $F$ :

$$\frac{dN_i^{Na}}{dt} = -\gamma(I_{Na} + 3I_p) , \quad (17S)$$

$$\frac{dN_i^K}{dt} = -\gamma(I_K - 2I_p) , \quad (18S)$$

$$\frac{dN_i^{Cl}}{dt} = \gamma I_{Cl} . \quad (19S)$$

The pump terms  $I_p$  account for exchange of intracellular  $\text{Na}^+$  for extracellular  $\text{K}^+$  at a 3/2 ratio. Pumping gets stronger when extracellular  $\text{K}^+$  ( $K_e$ ) or intracellular  $\text{Na}^+$  ( $Na_i$ ) concentrations increase and has a maximal turnover rate  $\rho$ :

$$I_p = \rho \left( 1 + \exp \left( \frac{15 - Na_i}{3} \right) \right)^{-1} \left( 1 + \exp (5.5 - K_e) \right)^{-1} \quad (20S)$$

Such a straightforward extension of the membrane model to include ion dynamics is found in many computational studies on SD, stroke and seizure-like brain dynamics [17, 1, 2, 3, 4, 6, 9, 18, 11, 19, 20]

Electroneutrality is important symmetry and is conserved in all compartments. Similarly, the model also ensures mass conservation in the system. Electroneutrality of the intracellular space implies that the intracellular charge concentration

$$Q_i := Na_i + K_i - Cl_i = Na_i^0 + K_i^0 - Cl_i^0 \quad (21S)$$

is constant. Where  $Na_i$ ,  $K_i$ , and  $Cl_i$  are intracellular concentrations of  $\text{Na}^+$ ,  $\text{K}^+$ , and  $\text{Cl}^+$  respectively. Accordingly  $Na_i$ ,  $K_i$  and  $Cl_i$  are not independent, and one of the rate Eqs. (17S)–(19S) can be replaced by simply solving Eq. (21S) for that variable. Note that initial physiological resting conditions are denoted by a superscript 0.

Also mass conservation holds and ion concentrations in the ECS follow from values in the ICS by solving the following constraint equations:

$$Na_i\omega_i + Na_e\omega_e = Na_i^0\omega_i + Na_e^0\omega_e , \quad (22S)$$

$$K_i\omega_i + K_e\omega_e = K_i^0\omega_i + K_e^0\omega_e + \Delta N^K , \quad (23S)$$

$$Cl_i\omega_i + Na_e\omega_e = Cl_i^0\omega_i + Cl_e^0\omega_e . \quad (24S)$$

The extracellular ion amounts follow from mass conservation. Thus we have

$$N_e^{Na,0} + N_i^{Na,0} = N_e^{Na} + N_i^{Na} - \Delta N_{glia}^{Na} , \quad (25S)$$

$$N_e^{K,0} + N_i^{K,0} = N_e^K + N_i^K - \Delta N_{glia}^K - \Delta N_{bath}^K , \quad (26S)$$

$$N_e^{Cl,0} + N_i^{Cl,0} = N_e^{Cl} + N_i^{Cl} - \Delta N_{glia}^{Cl} . \quad (27S)$$

The difference terms  $\Delta N_{glia}^{ion}$  and  $\Delta N_{bath}^K$  represent ion exchange with glia cells and an external  $K^+$  bath, respectively. The formulation in terms of these differences has been first proposed in Ref. [2], where it was also pointed out that particle exchange with external reservoirs is much slower than transmembrane ion fluxes (see below).

Diffusive coupling to the bath is driven by the concentration difference between the ECS and the bath:

$$\frac{d\Delta N_{bath}^K}{dt} = \lambda(K_e - K_{bath}) \quad (28S)$$

This coupling scheme is defined by the bath coupling strength  $\lambda$  and the  $K^+$  concentration in the bath  $K_{bath}$ . We are going to model an experimental procedure where brain slices are perfused with a high  $K^+$  solution to initiate SD. In the model this can be done by setting  $K_{bath}$  to a higher value.

Glial  $K^+$  buffering is modelled by assuming a  $K_e$ -dependent rate of  $K^+$  uptake

$$\lambda^{up} = \lambda_1 \left( 1.0 + \exp \left( \frac{5.5 - K_e}{2.5} \right) \right)^{-1} \quad (29S)$$

and a constant small re-release rate  $\lambda^{rel}$ :

$$\frac{d\Delta N_{glia}^K}{dt} = -\lambda^{rel} + \lambda^{up} \frac{\Delta N_{glia}^{K,max} - \Delta N_{glia}^K}{\Delta N_{glia}^{K,max}} \quad (30S)$$

Note that we assume a limited uptake capacity  $\Delta N_{glia}^{K,max}$ . Glia swelling will be important and it is hence necessary to include all glial ion fluxes (see below). The fluxes of  $Na^+$  and  $Cl^-$  can be approximated by

$$\Delta N_{glia}^{Na} = -0.2\Delta N_{glia}^K , \quad (31S)$$

$$\Delta N_{glia}^{Cl} = 0.8\Delta N_{glia}^K . \quad (32S)$$

This approximation is motivated by experimental data on glial ion channels and it guarantees electroneutrality [4]. Both bath coupling and the glial buffering model have been used in previous studies [17, 4]. The relationship between  $\Delta N_{glia}^{Na}$  and  $\Delta N_{glia}^K$  was derived and justified previously [4].

During SD neural and glial swelling reduce the ECS to about 25% of its normal value. This affects all extracellular particle concentrations dramatically. Swelling is driven by osmosis. Ion fluxes create osmotic gradients and cellular volumes adjust to re-establish osmotic equilibrium between ICS, ECS, and glia. Let us denote the respective volumes by  $\omega_{i/e/g}$  and the total amounts of matter by  $N_{i/e/g}$ , for example

$$N_i = N_i^{Na} + N_i^K + N_i^{Cl} + N_i^A + N_i^X . \quad (33S)$$

This expression contains additional types of particles, namely impermeant anions  $N_i^A$  and impermeant neutral matter  $N_i^X$ . They ensure initial osmotic equilibrium. The equilibrium is defined by the condition

$$\frac{N_i}{\omega_i} = \frac{N_e}{\omega_e} = \frac{N_g}{\omega_g} = \frac{N_{tot}}{\omega_{tot}} \quad \Rightarrow \quad \omega_{i/e/g} = N_{i/e/g} \frac{\omega_{tot}}{N_{tot}} , \quad (34S)$$

where  $N_{tot} = N_i + N_e + N_g$  and  $\omega_{tot} = \omega_i + \omega_e + \omega_g$ . This relation shows that the volume of a compartment grows and shrinks with the amount of particles in it, which is why events with extreme ion fluxes sometimes can lead to strong cellular swelling. Strictly speaking the above expression for  $\omega_{i/e/g}$  only gives the equilibrium volumes, which can differ from the actual volumes, because it takes time for the cells to swell and recover from swelling. However, it can be shown that for neurons and glia cells volume changes happen nearly instantaneously [4] and Eq. (34S) is satisfied at all times. We remark that the glial ion content is not modeled explicitly, but instead we assume an initial content  $N_g^0$  such that the glia cell is in balance with the ECS, i.e.,  $N_g^0/\omega_g^0 = N_e^0/\omega_e^0$ . The content at later times is then

$$N_g = N_g^0 + \Delta N_{glia}^{Na} + \Delta N_{glia}^K + \Delta N_{glia}^{Cl} . \quad (35S)$$

Volume changes are sometimes included in SD models. The volume model we chose is not the commonly used one, but it seems physically more consistent than the more phenomenological descriptions found in Refs. [21, 20, 6, 9] (for details see Ref. [4]).

## Modifications to the Membrane Potential and Ion Dynamics Due to Glutamate Dynamics

Please read “Glutamate-Related Processes” section in the main text first for the following equations to make sense. Uptake of glutamate goes along with ion cotransport [22]. For the neuron, one molecule of glutamate is accompanied by three  $\text{Na}^+$  and one  $\text{Cl}^-$ , while it releases one  $\text{K}^+$ . These contributions can be converted to the cotransport currents

$$I_{Na}^{co} = \frac{3}{\gamma}(v_{c \rightarrow n} + v_{e \rightarrow n}) , \quad (36S)$$

$$I_{Cl}^{co} = \frac{1}{\gamma}(v_{c \rightarrow n} + v_{e \rightarrow n}) , \quad (37S)$$

$$I_K^{co} = \frac{-1}{\gamma}(v_{c \rightarrow n} + v_{e \rightarrow n}) . \quad (38S)$$

These and the AMPA and NMDA currents must be added to the rate equation for the membrane potential and those for the ion changes, i.e. we need to replace

$$I_{Na} \longrightarrow I_{Na} + I_{Na}^{AMPA} + I_{Na}^{NMDA} + I_{Na}^{co} \quad (39S)$$

$$I_K \longrightarrow I_K + I_K^{AMPA} + I_K^{NMDA} + I_K^{co} \quad (40S)$$

$$I_{Cl} \longrightarrow I_{Cl} + I_{Cl}^{co} \quad (41S)$$

in Eqs. (1S) and (17S–19S).

## Morphology

Most single-compartment models for neural ion dynamics assume a nearly spherical shape which resembles a soma rather than a whole neuron. However, glutamate dynamics mostly involves processes at the dendritic terminals, so this assumption is not appropriate here. For glutamate dynamics, it is relevant that how many synapses are there, how large the ECS is and how much membrane surface area is available to take up glutamate from the ECS back into the cells.

Table B compares values for a soma and a whole neuron including the dendrites. We use the values of the latter. Moreover we assume glia cells of equal size and an extracellular volume that corresponds to about 15% of the whole tissue [17, 23, 24]. This is achieved by assuming volume ratios 3: 1: 3 between ICS, ECS, and glia, respectively. Note that the values given in Table B are initial resting values and will change during SD.

## References

1. Hübel N, Schöll E, Dahlem MA (2014) Bistable dynamics underlying excitability of ion homeostasis in neuron models. *PLoS Comp Biol* 10: e1003551.
2. Hübel N, Dahlem MA (2014) Dynamics from seconds to hours in Hodgkin–Huxley model with time–dependent ion concentrations and buffer reservoirs. *PLoS Comp Biol* 10: e1003941.
3. Hübel N, Andrew DR, Ullah G (2016) Large extracellular space leads to neuronal susceptibility to ischemic injury in  $\text{Na}^+/\text{K}^+$  pumps-dependent manner. *J Comput Neurosci* 40: 177–192.
4. Hübel N, Ullah G (2016) Anions govern cell volume: A case study of relative astrocytic and neuronal swelling in spreading depolarization. *PLoS ONE* 11: e0147060.
5. Ullah G, Cressman Jr JR, Barreto E, Schiff SJ (2009) The influence of sodium and potassium dynamics on excitability, seizures, and the stability of persistent states: II. network and glial dynamics. *J Comput Neurosci* 26: 171–183.
6. Ullah G, Wei Y, Dahlem MA, Wechselberger M, Schiff SJ (2015) The role of cell volume in the dynamics of seizure, spreading depression, and anoxic depolarization. *PLoS Comp Biol* 11: e1004414.
7. Ullah G, Schiff SJ (2010) Assimilating seizure dynamics. *PLoS Comput Biol* 6: e1000776.
8. Ullah G, Schiff SJ (2009) Tracking and control of neuronal Hodgkin-Huxley dynamics. *Phys Rev E* 79: 040901.
9. Wei Y, Ullah G, Schiff SJ (2014) Unification of neuronal spikes, seizures, and spreading depression. *J Neurosci* 34: 11733–11743.
10. Wei Y, Ullah G, Ingram J, Schiff SJ (2014) Oxygen and seizure dynamics: II. Computational modeling. *J Neurophysiol* 112: 213–223.
11. Cressman Jr JR, Ullah G, Ziburkus J, Schiff SJ, Barreto E (2009) The influence of sodium and potassium dynamics on excitability, seizures, and the stability of persistent states: I. single neuron dynamics. *J Comput Neurosci* 26: 159–170.



12. Cressman Jr JR, Ullah G, Ziburkus J, Schiff SJ, Barreto E (2011) Erratum to: The influence of sodium and potassium dynamics on excitability, seizures, and the stability of persistent states: I. single neuron dynamics. *J Comput Neurosci* 30: 781.
13. Hodgkin AL, Huxley AF (1952) A quantitative description of membrane current and its application to conduction and excitation in nerve. *J Physiol* 117: 500–544.
14. Gutkin BS, Laing CR, Colby CL, Chow CC, Ermentrout GB (2001) Turning on and off with excitation: The role of spike–timing asynchrony and synchrony in sustained neural activity. *J Comp Neurosci* 11: 121–134.
15. Hille B, et al. (2001) *Ion channels of excitable membranes*, volume 507. Sinauer Sunderland, MA.
16. Hodgkin AL, Katz B (1949) The effect of sodium ions on the electrical activity of the giant axon of the squid. *J Physiol* 108: 37–77.
17. Kager H, Wadman WJ, Somjen GG (2000) Simulated seizures and spreading depression in a neuron model incorporating interstitial space and ion concentrations. *J Neurophysiol* 84: 495–512.
18. Barreto E, Cressman JR (2010) Ion concentration dynamics as a mechanism for neural bursting. *J Biol Phys* 37: 361–373.
19. Zandt BJ, ten Haken B, van Dijk JG, van Putten MJ (2011) Neural dynamics during anoxia and the “wave of death”. *PLoS ONE* 6: e22127.
20. Yao C, Zhan M (2010) Signal transmission by vibrational resonance in one-way coupled bistable systems. *Phys Rev E* 81: 061129.
21. Kager H, Wadman WJ, Somjen GG (2002) Conditions for the triggering of spreading depression studied with computer simulations. *J Neurophysiol* 88: 2700.
22. Benarroch EE (2010) Glutamate transporters—diversity, function, and involvement in neurologic disease. *Neurology* 74: 259–64.
23. Azevedo FA, Carvalho LR, Grinberg LT, Farfel JM, Ferretti RE, et al. (2009) Equal numbers of neuronal and nonneuronal cells make the human brain an isometrically scaled-up primate brain. *J Comp Neurol* 513: 532–541.

24. Ascoli GA, Donohue DE, Halavi M (2007) Neuromorpho.org: a central resource for neuronal morphologies. *J Neurosci* 27: 9247–9251.

Table A: Parameters for membrane and ion dynamics, and initial concentrations.

| <b>Name</b>               | <b>Value &amp; unit</b>        | <b>Description</b>                             |
|---------------------------|--------------------------------|------------------------------------------------|
| $C_m$                     | 1 $\mu\text{F}/\text{cm}^2$    | membrane capacitance                           |
| $\phi$                    | 3/msec                         | gating time scale parameter                    |
| $g_{Na}^l$                | 0.0135 mS/cm <sup>2</sup>      | Na <sup>+</sup> leak cond.                     |
| $g_{Na}^g$                | 100 mS/cm <sup>2</sup>         | max. gated Na <sup>+</sup> cond.               |
| $g_K^l$                   | 0.05 mS/cm <sup>2</sup>        | K <sup>+</sup> leak cond.                      |
| $g_K^g$                   | 40 mS/cm <sup>2</sup>          | max. gated K <sup>+</sup> cond.                |
| $g_{Cl}^l$                | 0.05 mS/cm <sup>2</sup>        | Cl <sup>-</sup> leak cond.                     |
| $F$                       | 96,485 C/mol                   | Faraday's constant                             |
| $\rho$                    | 6.46 $\mu\text{A}/\text{cm}^2$ | max. pump current                              |
| $\lambda$                 | 1e-4 /msec                     | bath coupling strength                         |
| $K_{bath}$                | 4 mM                           | K <sup>+</sup> con. in bath                    |
| $\lambda_1$               | 1.44e-2 mM/msec                | glial K <sup>+</sup> uptake parameter          |
| $\lambda^{rel}$           | 5.1e-3 mM/msec                 | glial K <sup>+</sup> release rate              |
| $\Delta N_{glia}^{K,max}$ | 350 fmol                       | K <sup>+</sup> uptake capacity of glia cell    |
| $Na_i^0$                  | 15 mM                          | init. conc. of Na <sup>+</sup> in ICS          |
| $Na_e^0$                  | 144 mM                         | init. conc. of Na <sup>+</sup> in ECS          |
| $K_i^0$                   | 140 mM                         | init. conc. of K <sup>+</sup> in ICS           |
| $K_e^0$                   | 4 mM                           | init. conc. of K <sup>+</sup> in ECS           |
| $Cl_i^0$                  | 9 mM                           | init. conc. of Cl <sup>-</sup> in ICS          |
| $Cl_e^0$                  | 130 mM                         | init. conc. of Cl <sup>-</sup> in ECS          |
| $A_i$                     | 146 mM                         | init. conc. of imperm. anions in ICS           |
| $A_e$                     | 18 mM                          | init. conc. of imperm. anions in ECS           |
| $X_i$                     | 5 mM                           | init. conc. of imperm. neutral matter in ICS   |
| $X_e$                     | 19 mM                          | init. conc. of imperm. neutral matter in ECS   |
| $M_g$                     | 315 mM                         | init. conc. of all matter in glial compartment |

Table B: Morphological parameters.

| Name        | Value & unit               | Description                               |
|-------------|----------------------------|-------------------------------------------|
| $\omega_i$  | $\sim 2,000 \mu\text{m}^3$ | soma volume                               |
| $A_m^{(n)}$ | $\sim 900 \mu\text{m}^2$   | soma membrane surface area                |
| $\omega_i$  | $7,500 \mu\text{m}^3$      | volume of whole neuron                    |
| $\omega_g$  | $7,500 \mu\text{m}^3$      | glia volume (equal size as neuron)        |
| $\omega_e$  | $2,500 \mu\text{m}^3$      | ECS volume ( $\sim 15\%$ of whole tissue) |
| $A_m^{(n)}$ | $18,000 \mu\text{m}^2$     | neural membrane surface area              |
| $A_m^{(g)}$ | $18,000 \mu\text{m}^2$     | glial membrane surface area               |

Table C: Parameters for glutamate-related processes.

| Name                        | Value & unit                   | Description                                               |
|-----------------------------|--------------------------------|-----------------------------------------------------------|
| $V_{cr}$                    | -50 mV                         | critical potential parameter                              |
| $V_{hi}$                    | 50 mV                          | high potential parameter                                  |
| $R_{max}$                   | 1.50e-5 fmol/msec              | maximal release rate                                      |
| $N_{syn}$                   | 5000                           | number of synapses                                        |
| $N_{max}^G$                 | 10 fmol                        | glutamate available for signaling                         |
| $\alpha_{NMDA}$             | 0.072 / (mM $\times$ msec)     | receptor gating constant                                  |
| $\beta_{NMDA}$              | 0.0066 /msec                   | receptor gating constant                                  |
| $\alpha_{AMPA}$             | 1.1 / (mM $\times$ msec)       | receptor gating constant                                  |
| $\beta_{AMPA}$              | 0.19 /msec                     | receptor gating constant                                  |
| $\bar{g}_{NMDA}$            | 0.139 mS/cm <sup>2</sup>       | max. cond. of NMDA rcpt. channel                          |
| $\bar{g}_{AMPA}$            | 0.486 mS/cm <sup>2</sup>       | max. cond. of AMPA rcpt. channel                          |
| [Mg <sup>2+</sup> ]         | 1.2 mM                         | external [Mg <sup>2+</sup> ] concentration                |
| $r$                         | 100 nm                         | cleft radius                                              |
| $h$                         | 20 nm                          | cleft height                                              |
| $\omega_c$                  | 1.26e-3 $\mu$ m <sup>3</sup>   | cleft volume                                              |
| $\omega_{en}$               | 3.77e-3 $\mu$ m <sup>3</sup>   | volume within envelope                                    |
| $A_\sigma$                  | 6.3e-3 $\mu$ m <sup>2</sup>    | flux cross section area                                   |
| $D_G$                       | 0.3 $\mu$ m <sup>2</sup> /msec | glutamate diffusion coefficient                           |
| $\Delta x$                  | 20 $\mu$ m                     | distance from cleft to stationary extrac. glutamate conc. |
| $v_{c \rightarrow n}^{max}$ | 0.03 mM/msec                   | maximal glutamate uptake rate (cleft to neuron)           |
| $k_m$                       | 0.03 mM                        | equilibration constant for glutamate uptake               |
| $k_{rec}$                   | 0.001 fmol/msec                | glutamate recycling rate                                  |

Table D: Polarized vs depolarized membrane state.

| Name     | Value & unit                 | Description                                   |
|----------|------------------------------|-----------------------------------------------|
| $E_K$    | -40.5 mV                     | K <sup>+</sup> Nernst potential               |
| $E_{Na}$ | -22.1 mV                     | Na <sup>+</sup> Nernst potential              |
| $E_{Cl}$ | -34.2 mV                     | Cl <sup>-</sup> Nernst potential              |
| $I_p$    | 6.46 $\mu$ A/cm <sup>2</sup> | pump current                                  |
| $V$      | -34.2 mV                     | depolarized potential                         |
| $g_K$    | 2.045 mS/cm <sup>2</sup>     | K <sup>+</sup> cond. in depolarized state     |
| $g_{Na}$ | 1.603 mS/cm <sup>2</sup>     | Na <sup>+</sup> cond. in depolarized state    |
| $V$      | -92.1 mV                     | hyperpolarized potential                      |
| $g_K$    | 0.050 mS/cm <sup>2</sup>     | K <sup>+</sup> cond. in hyperpolarized state  |
| $g_{Na}$ | 0.0135 mS/cm <sup>2</sup>    | Na <sup>+</sup> cond. in hyperpolarized state |
